# Supplementary material for: Identification and Quantification of Key Phytochemicals, Phytohormones, and Antioxidant Properties in Coccinia grandis during Fruit Ripening
Source: MDPI journal article supplement (doi:10.3390/antiox11112218), 2022-11-10
Supplement: s1 [file s1]

# Supplementary Materials:

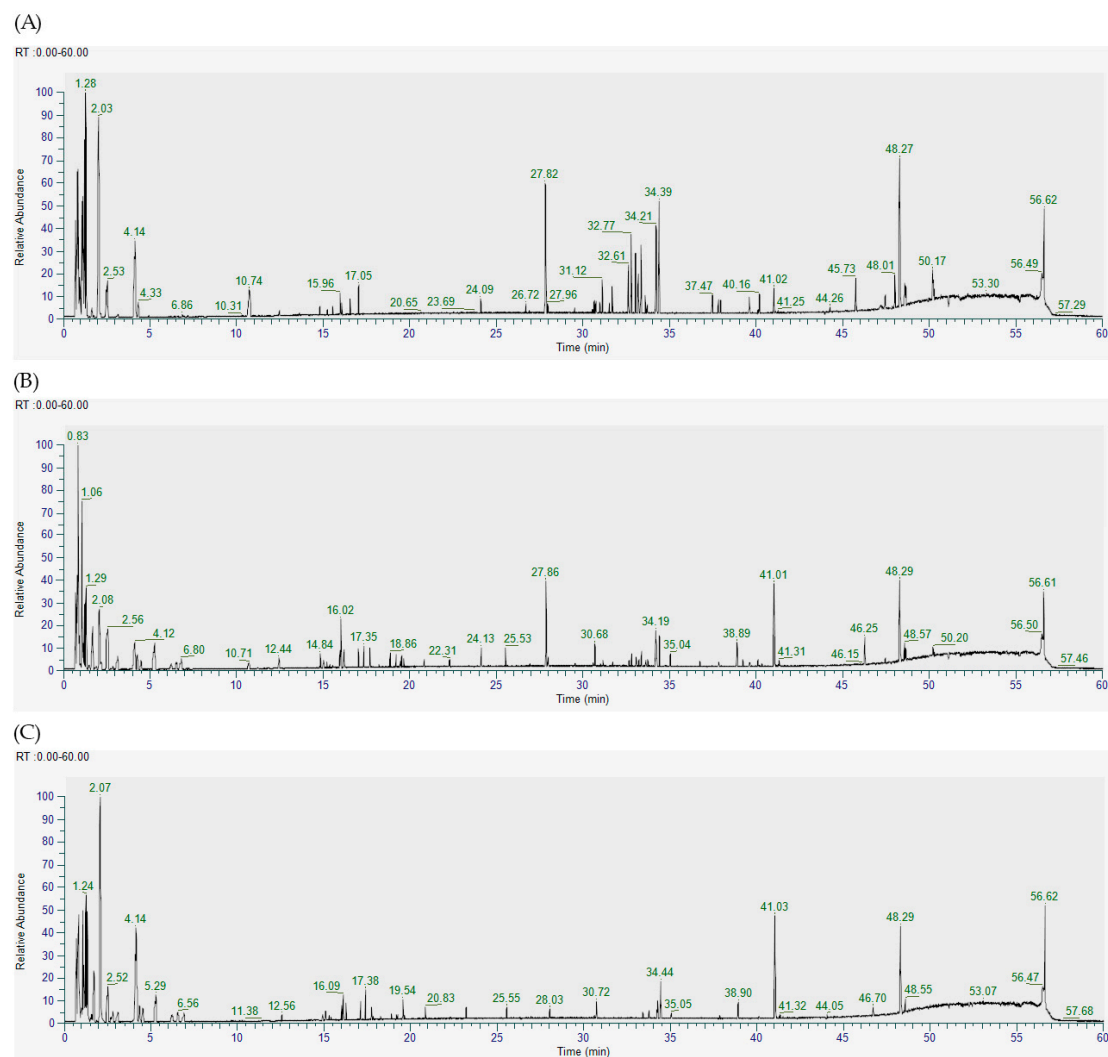

**Figure S1.** Total Ion Chromatogram of methanolic extract of *C. grandis* in positive mode (A) GRS, (B) HRS, (C) FRS.

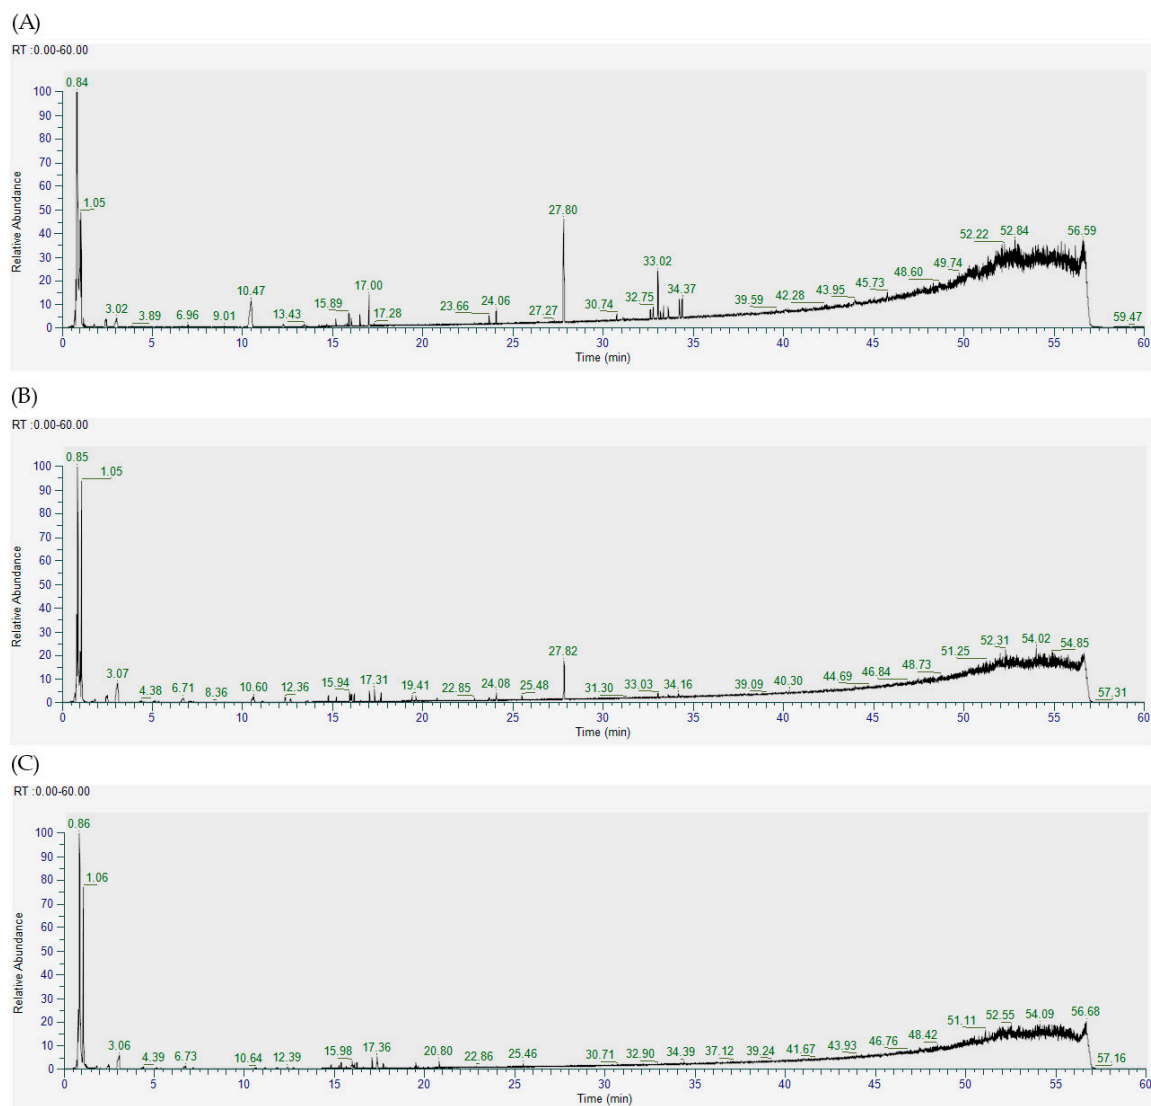

**Figure S2.** Total ion chromatogram (TIC) of methanolic extract of *C. grandis* in negative mode (A) GRS, (B) HRS, (C) FRS.

(A)

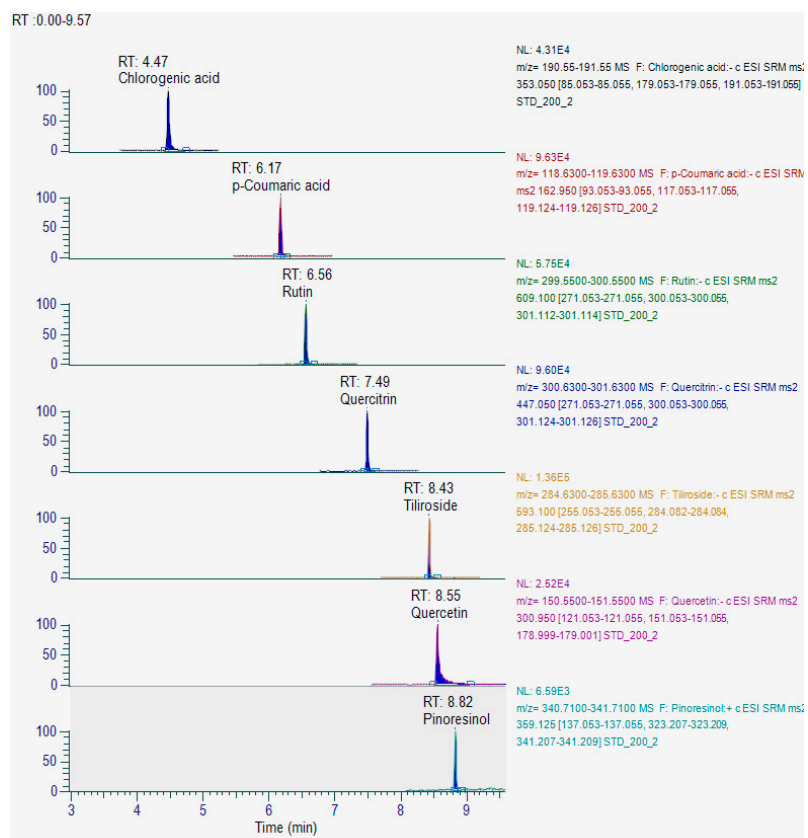

(B)

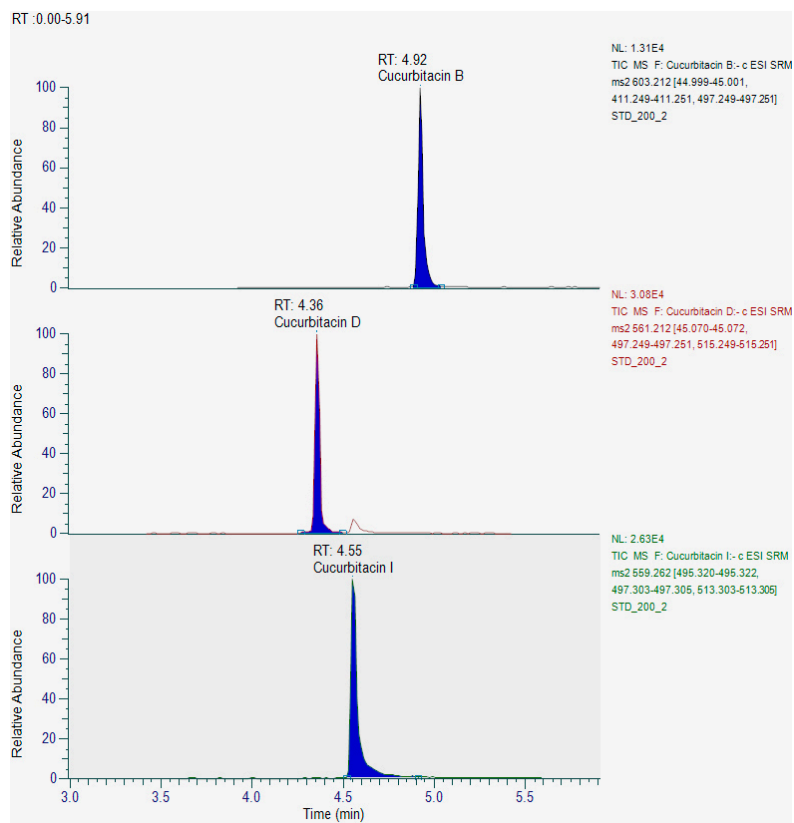

(C)

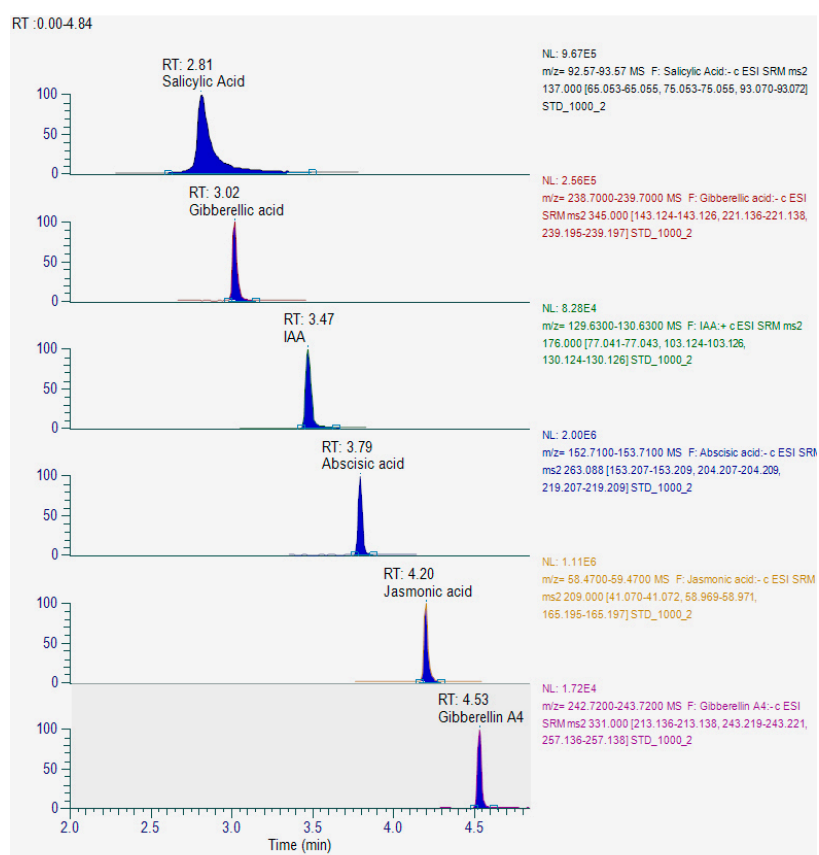

**Figure S3.** Chromatogram of standard solution mixtures (A) Polyphenols (B) Triterpenes (C) Phytohormones.

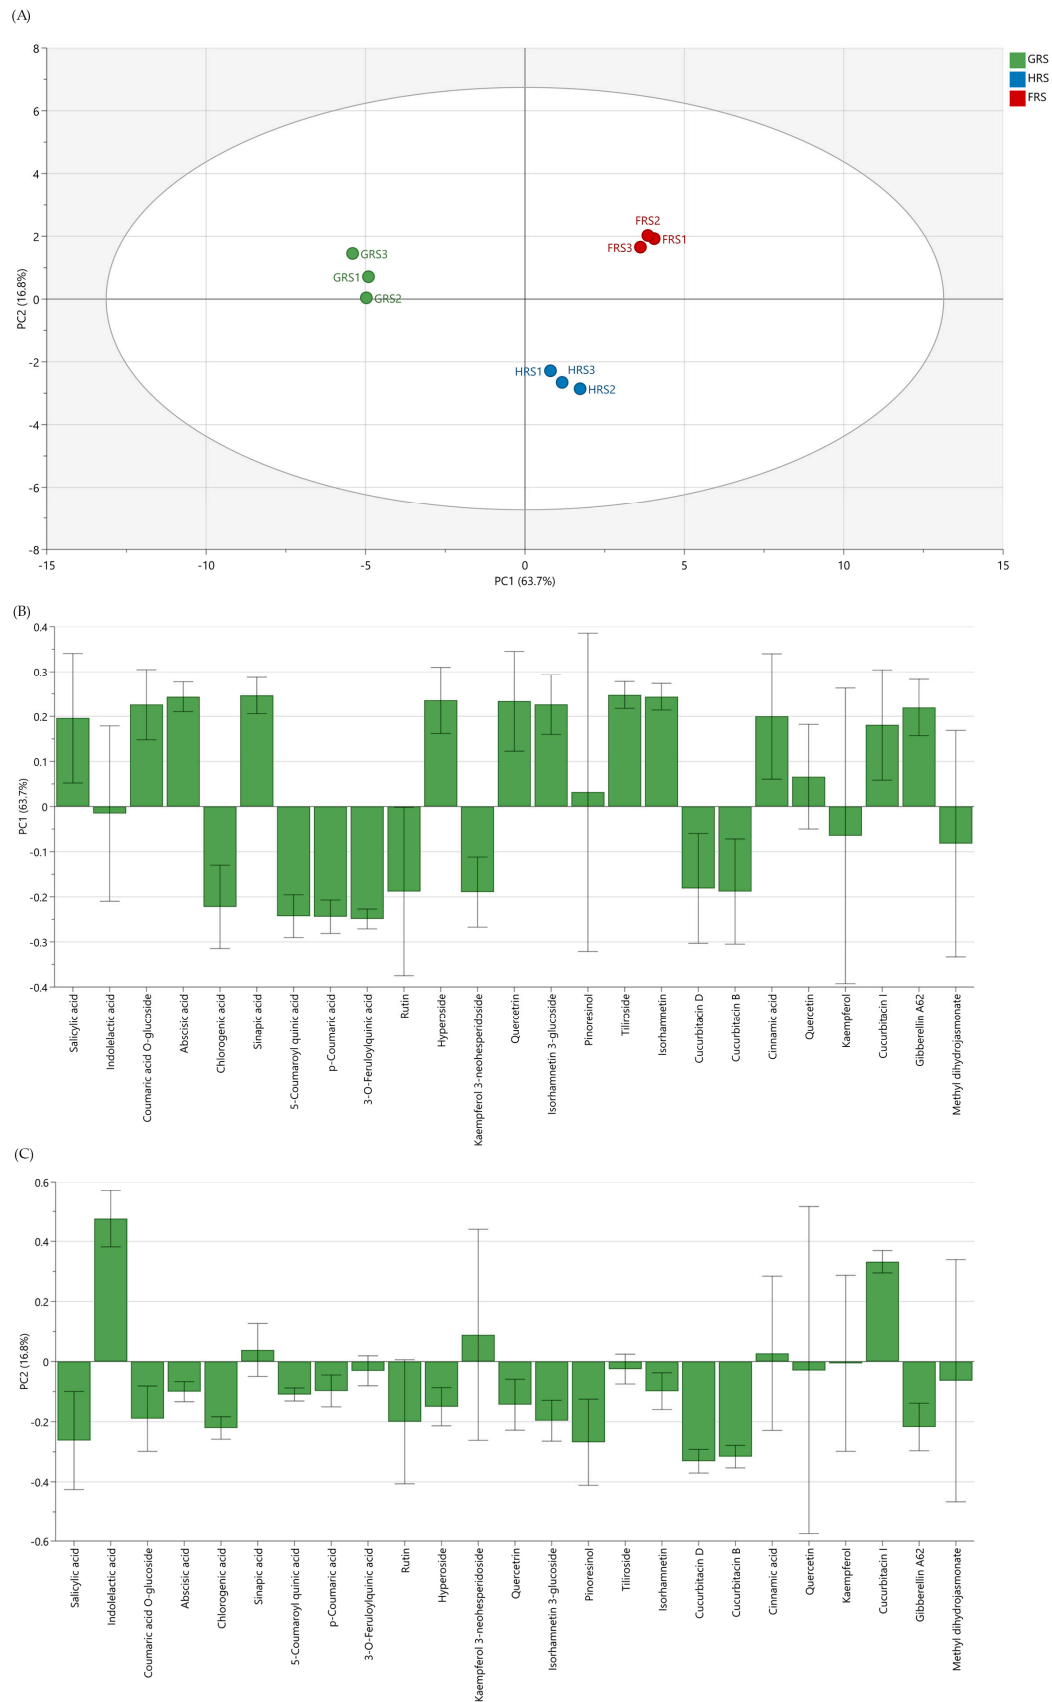

**Figure S4.** Score biplot and loading obtained from LC-MS data of *Coccinia grandis* fruits at different stages of ripening (A) Score plot, (B) Loading plot (PC 1), (C) Loading plot (PC 2).

**Table S1.** Validation data including the range, correlation coefficient (r), slope of the calibration curve, standard deviation, intercept, intercept error, IDL, I-LOQ, LOD, LOQ for the analytes.

| Analyte Name                 | Range  | r <sup>2</sup> | Slope of the calibration curve (S) | Standard deviation ( $\sigma$ ) | Intercept   | Intercept error | IDL (ng/mL) | I-LOQ (ng/mL) | LOD = 3.3 $\sigma$ /S | LOQ = 10 $\sigma$ /S |
|------------------------------|--------|----------------|------------------------------------|---------------------------------|-------------|-----------------|-------------|---------------|-----------------------|----------------------|
| <b>Hydroxycinnamic acids</b> |        |                |                                    |                                 |             |                 |             |               |                       |                      |
| Chlorogenic acid             | 1–200  | 0.9999         | 654.56119                          | 2.98072                         | −1650.1475  | 1286.00901      | 0.01503     | 0.04554       | 0.15027               | 0.45538              |
| p-Coumaric acid              | 1–200  | 0.9999         | 1106.68621                         | 4.23729                         | −1188.93817 | 1710.09056      | 0.01264     | 0.03829       | 0.12635               | 0.38288              |
| <b>Flavonols</b>             |        |                |                                    |                                 |             |                 |             |               |                       |                      |
| Quercetin                    | 1–200  | 0.9999         | 459.03227                          | 1.6648                          | −1242.82828 | 324.01067       | 0.01197     | 0.03627       | 0.11968               | 0.36268              |
| Quercitrin                   | 1–200  | 0.9999         | 944.86202                          | 2.70439                         | 770.48535   | 235.384         | 0.00945     | 0.02862       | 0.09445               | 0.28622              |
| Rutin                        | 1–200  | 0.9999         | 583.72238                          | 1.69785                         | −117.96905  | 330.44387       | 0.00960     | 0.02909       | 0.09599               | 0.29087              |
| Tiliroside                   | 1–200  | 0.9999         | 1264.20427                         | 3.44481                         | −1020.57657 | 1091.05152      | 0.00899     | 0.02725       | 0.08992               | 0.27249              |
| <b>Lignan</b>                |        |                |                                    |                                 |             |                 |             |               |                       |                      |
| Pinoresinol                  | 5–200  | 0.9999         | 57.04133                           | 0.10122                         | 251.61347   | 43.67068        | 0.00586     | 0.01775       | 0.05856               | 0.17745              |
| <b>Triterpenes</b>           |        |                |                                    |                                 |             |                 |             |               |                       |                      |
| Cucurbitacin B               | 1–1000 | 0.9999         | 105.98924                          | 0.18708                         | 196.03561   | 75.50393        | 0.00582     | 0.01765       | 0.05825               | 0.17651              |
| Cucurbitacin D               | 1–1000 | 0.9999         | 189.58872                          | 0.25215                         | 329.78722   | 95.94343        | 0.00439     | 0.01330       | 0.04389               | 0.13300              |
| Cucurbitacin I               | 1–1000 | 0.9999         | 30.5554                            | 0.0652                          | −10.55902   | 23.53632        | 0.00704     | 0.02134       | 0.07042               | 0.21338              |
| <b>Phytohormone</b>          |        |                |                                    |                                 |             |                 |             |               |                       |                      |
| Absciscic acid               | 1–100  | 0.9999         | 3630.01442                         | 16.39196                        | −4047.3246  | 1334.5862       | 0.01490     | 0.04516       | 0.29803               | 0.45157              |
| Gibberellic acid             | 1–100  | 0.9999         | 739.58361                          | 1.39023                         | −129.95983  | 59.98068        | 0.00620     | 0.01880       | 0.12406               | 0.18797              |
| Gibberellin A4               | 1–100  | 0.9999         | 37.01639                           | 0.41086                         | 1.48927     | 19.1456         | 0.03663     | 0.11099       | 0.73256               | 1.10994              |
| Indoleacetic acid            | 1–100  | 0.9999         | 318.69701                          | 1.45715                         | 50.44385    | 32.74528        | 0.01509     | 0.04572       | 0.30177               | 0.45722              |
| Jasmonic acid                | 1–100  | 0.9999         | 2031.44078                         | 4.66842                         | −940.63147  | 104.90961       | 0.00758     | 0.02298       | 0.15167               | 0.22981              |
| Salicylic Acid               | 1–100  | 0.9999         | 5014.04266                         | 20.58744                        | −20757.9842 | 7431.67977      | 0.01355     | 0.04106       | 0.27099               | 0.41060              |
